# Supplementary material for: A multidimensional framework for mapping social need to electronic health records in people with multimorbidity
Source: Research Square preprint supplement (doi:10.21203/rs.3.rs-6527973/v1), 2025-05-20
Supplement: Supplementary file 1 [file 6867ff816c8edd6d2202390b.docx]

**Supplementary Material**

| Supplementary Table 1. List of Long-Term Conditions (LTC) identified in the Clinical Practice Research Datalink (CPRD) Database, mapped against the original 59 LTC conditions defined through national consensus [17]. Some conditions have been grouped based on their availability in the CPRD Database. | **Long-Term Conditions in the Original 59 Conditions** | **Long-Term Conditions Present in The Study** |
| --- | --- | --- |
| 1 | Addison’s Disease | Yes |
| 2 | Anaemia | Yes  Present as Pernicious anaemia |
| 3 | Anxiety | Yes |
| 4 | Depression | Yes |
| 5 | Congenital Heart Disease | Yes |
| 6 | Chromosomal Abnormality | Yes |
| 7 | Bipolar Disorder | Yes |
| 8 | Schizophrenia | Yes |
| 9 | Chronic Liver Disease | Yes |
| 10 | Alcohol-related Liver Disease | Merged and renamed as: Chronic Liver Disease and Alcoholic Liver Disease |
| 11 | Aortic Aneurysm | Yes |
| 12 | Arrhythmia | Yes |
| 13 | Asthma | Yes |
| 14 | Autism | Yes |
| 15 | Bronchiectasis | Yes |
| 16 | Cancer | Yes |
| 17 | Cerebral Benign Tumours | No |
| 18 | Chronic Back Pain | No |
| 19 | Chronic Lyme Disease | Yes |
| 20 | Chronic Pancreatitis | Yes |
| 21 | Chronic Kidney Disease stage 3-5 | Yes |
| 22 | Chronic Pain | Yes |
| 23 | Chronic Obstructive Pulmonary Disease | Yes |
| 24 | Chronic Urinary Tract Infections | Yes |
| 25 | Connective Tissue Disease | Yes |
| 26 | Coronary Heart Disease | Yes |
| 27 | Heart Failure | Yes |
| 28 | Hypertension | Yes |
| 29 | Cystic Fibrosis | Yes |
| 30 | Dementia | Yes |
| 31 | Diabetes | Yes |
| 32 | Drug or Alcohol Misuse | Yes |
| 33 | Eating Disorders | Yes |
| 34 | Endometriosis Adenomyosis | Yes |
| 35 | Epilepsy | Yes |
| 36 | Gout | Yes |
| 37 | Hearing Loss | Yes |
| 38 | Hemi/Para/Quadriplegia | No |
| 39 | HIV/AIDS | Yes |
| 40 | Inflammatory Bowel Disease | Yes |
| 41 | Long COVID | Yes  Present as Post-Acute COVID 19 |
| 42 | Meniere’s Disease | Yes |
| 43 | Multiple Sclerosis | Yes |
| 44 | Musculoskeletal Injury | Yes |
| 45 | Osteoarthritis | Yes |
| 46 | Osteoporosis | Yes |
| 47 | Parkinson’s Disease | Yes |
| 48 | Peptic Ulcer Disease | Yes |
| 49 | Peripheral Neuropathy | Yes |
| 50 | Peripheral Vascular Disease | Yes |
| 51 | Post-Traumatic Stress Disorder | Yes |
| 52 | Sickle Cell Disease | No |
| 53 | Stroke | Yes |
| 54 | Thyroid Disease | Yes |
| 55 | Transient Ischemic Attack | Yes |
| 56 | Tuberculosis | Yes |
| 57 | Valvular Diseases | Yes  Present as Heart Valvular Disorder |
| 58 | Venous Thromboembolism | Yes |
| 59 | Visual Impairment | Yes |

Supplementary Table 2. Categorisation of the 56 Long-Term Conditions (LTC) identified in the Clinical Practice Research Datalink (CPRD) according to the 14 body systems defined by ICD-10 chapters. [17]

| **Body System** | **Conditions** |
| --- | --- |
| **Cardiovascular** | Stroke, Coronary Heart Disease, Heart Failure, Peripheral Vascular Disease, Heart Valve Disorder, Arrhythmia, Venous Thromboembolic Disease, Aortic Aneurysm, Hypertension |
| **Metabolic and Endocrine** | Diabetes, Addison’s Disease, Cystic Fibrosis, Thyroid Disorders |
| **Respiratory** | Chronic Obstructive Pulmonary Disease (COPD), Asthma, Bronchiectasis |
| **Neurological** | Parkinson’s Disease, Epilepsy, Multiple Sclerosis, Paralysis, Transient Ischaemic Attack (TIA), Peripheral Neuropathy, Chronic Pain |
| **Cancers** | Solid Organ Cancer, Haematological Cancers, Metastatic Cancers, Melanoma, Cerebral Tumours that can cause disability. |
| **Mental and Behavioural** | Dementia, Schizophrenia, Depression, Anxiety, Bipolar Disorder, Drug/Alcohol Misuse, Eating Disorder, Autism, Post-Traumatic Stress Disorder (PTSD) |
| **Musculoskeletal** | Connective Tissue Disease, Osteoarthritis, Long-Term Musculoskeletal Problems due to Injury, Osteoporosis, Gout |
| **Digestive** | Chronic Liver Disease, Inflammatory Bowel Disease (IBD), Chronic Pancreatitis, Peptic Ulcers |
| **Urogenital** | Chronic Kidney Disease, End-Stage Kidney Disease, Endometriosis, Chronic Urinary Tract Infection |
| **Haematological** | Anaemia (including Pernicious Anaemia and Sickle Cell Disease) |
| **Eye** | Vision Impairment that cannot be corrected. |
| **Ear** | Hearing Impairment that cannot be corrected, Meniere’s Disease |
| **Infections** | HIV/AIDS, Chronic Lyme Disease, Tuberculosis, Post-Acute COVID-19 |
| **Congenital** | Congenital Disease and Chromosomal Abnormalities |

**Supplementary Table 3**. Domains and descriptions of social needs as defined in the framework. This table outlines all aspects covered for each social need domain. Relevant codes for these aspects were identified and utilised in the analysis using Clinical Practice Research Datalink (CPRD) data.

| **Domain** | **Description** |
| --- | --- |
| **Activities of daily living needs** | Social needs associated with carrying out activities of daily living (ADLs) including:   - Ambulating - the extent of an individual’s capability to move from one position to another, perform basic movements and dexterity. - Feeding - ability to feed oneself without assistance. - Dressing - ability to put on their clothes and select appropriate clothing. - Personal hygiene - ability to undertake basic washing, bathing, and grooming, maintain personal hygiene including dental, nail, and hair care. - Continence – ability to control bladder and/or bowel function. - Toileting - ability to get to and from the toilet, using it appropriately and cleaning oneself. |
| **Mobility needs** | Social needs resulting from difficulties with physical mobility, require the provision of mobility aids or equipment, professional input and care and financial support with mobility including:   - Wheelchair use. - Non-wheelchair mobility aid use (e.g., walking stick, Zimmer frame, mobility scooter). - Professional care staff provision to assist with mobility. - Receives disability living allowance. - Receives mobility allowance. |
| **Financial needs** | Social needs relating to challenges an individual may have managing their personal finances employment-related difficulties and receiving assistance from a range of financial support services, including:   - Difficulty budgeting and handling money. - Employment status (e.g., unemployed, or long-term sick). - Referral and/or input from financial adviser or financial services. - Receipt of assistance from support services such as food banks, accessing the affordable warm programme. - Difficulty writing cheques, using a credit cards, carrying out arithmetic reasoning related to money and difficulty managing bank accounts. |
| **Disability needs** | Social needs resulting from specific disabilities or impairments including:   - Mental health disability. - Intellectual disability. - Learning disability. - Speech, hearing, and sensory disabilities. - Any state assessment of disability. |
| **Community care needs** | Social needs requiring support from a range of community health and social care services and practitioners, including:   - Community physiotherapist or occupational therapy. - Drug and alcohol team. - Mental health team. - Social care services. - Outreach or voluntary services. - Community nurses, specialist nurses or matrons. - Community secondary care professionals. - Audiology. - Palliative care team. - Dietician. - Community care navigator or social care prescribers. - Pharmacy input. |
| **Residency status needs** | Social needs relating to residential status including:   - Hospice care. - Nursing home care. - Care home. - Own home with adaptations. |
| **Social care networking needs** | Social care needs associated with an individual’s ability to socially connect, network, and participate in social care activities including:   - Ability to maintain meaningful relationships with family, friends, and others. - Ability to socialise and mix with others in social care contexts. - Ability to effectively communicate verbally and non-verbally. - Ability to participate in hobbies, leisure, and community activities. - Access to and ability to organise transportation. - Input from professional services to socially connect and participate such as day units or visits from charities for loneliness. |
| **Bereavement needs** | Social care needs arising from family bereavement including:   - Death of a partner, husband, wife, sibling, child including neonatal and postnatal death, sudden infant death, maternal death. - Input from professional services including referral to or use of bereavement counselling or therapies. |
